# Supplementary material for: Promoting effects of potassium on ammonia production from electrochemical nitrate reduction over nano-crystal nickel
Source: Royal Society of Chemistry journal article supplement (doi:10.1039/d4ta03969f), 2024-01-01
Supplement: d4ta03969f1.pdf [file d4ta03969f1.pdf]

1

## Supporting information for

# 2 Promoting effect of potassium on ammonia production 3 from electrochemical nitrate reduction over nano- 4 crystal nickel

5 Chunxia Zhang <sup>a</sup>, Zhengying Xue <sup>b</sup>, Yong Jiang <sup>c</sup>, Yunpu Zhai <sup>b</sup>, Changsen Zhang <sup>a</sup>,  
6 Juexiu Li <sup>d</sup>, and Panpan Liu <sup>a,\*</sup>

7 <sup>a</sup> School of Ecology & Environment, Zhengzhou University, Zhengzhou 450001,  
8 Henan, P.R. China

9 <sup>b</sup> College of Chemistry, Zhengzhou University, Zhengzhou 450001, Henan, P.R. China

10

11 <sup>c</sup> College of Resources and Environment, Fujian Agriculture and Forestry University,  
12 Fuzhou 350002, Fujian, P.R. China

13 <sup>d</sup> School of Smarts Energy & Environment, Zhongyuan University of Technology,  
14 Zhengzhou 450007, Henan, P.R. China

15

16 \*Corresponding author: Dr. Panpan Liu.

17 School of Ecology & Environment

18 Zhengzhou University, Zhengzhou 450001, P.R. China

19 Email: [liupanpan@zzu.edu.cn](mailto:liupanpan@zzu.edu.cn)

20 Tel: +86 371 67781163

21 Fax: +86 371 67781163

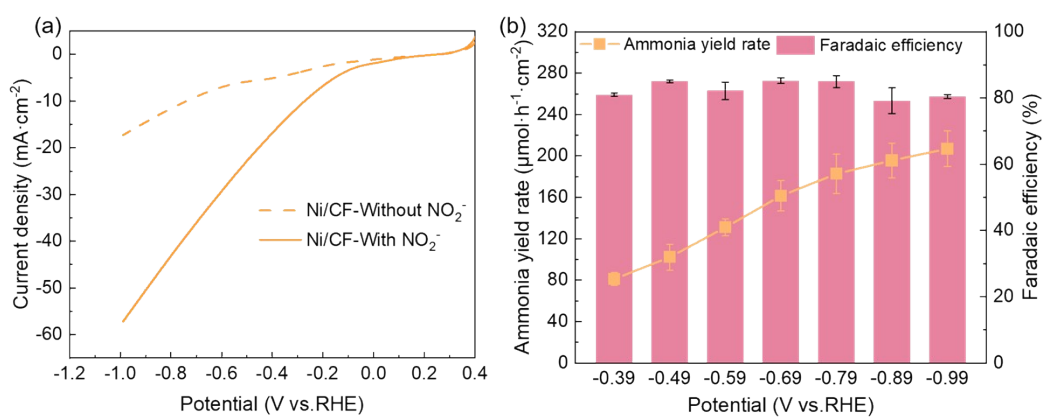

22

23 **Fig. S1** (a) LSV curves of Ni/CF with and without  $\text{NO}_2^-$ ; (b)  $\text{NH}_3$  yield rate and FE in

24  $0.1\text{M}\text{NO}_2^-$  at various potentials over Ni/CF.

25

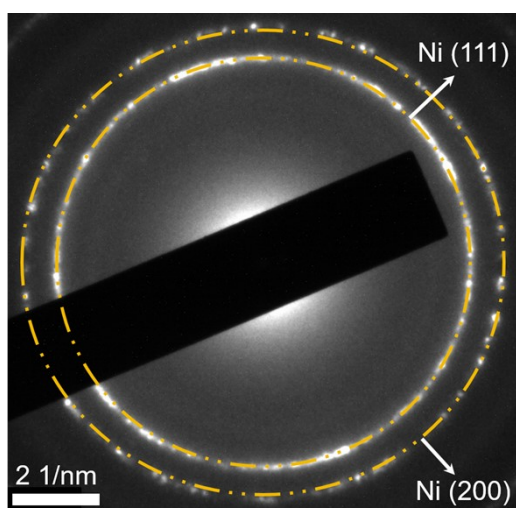

26

27 **Fig. S2** SAED pattern of Ni/CF.

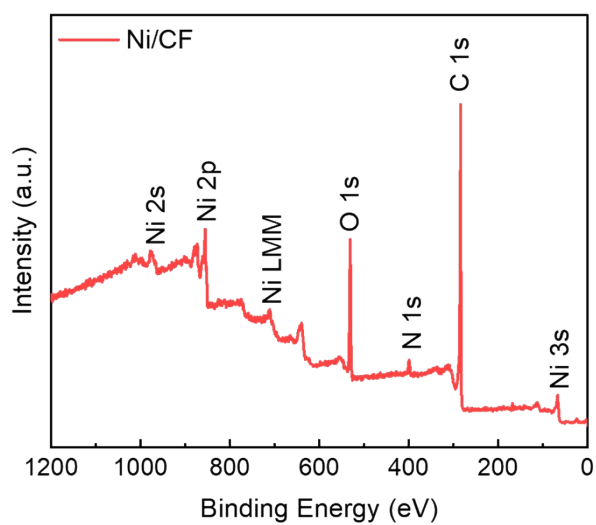

28

29 **Fig. S3** XPS survey spectra of Ni/CF.

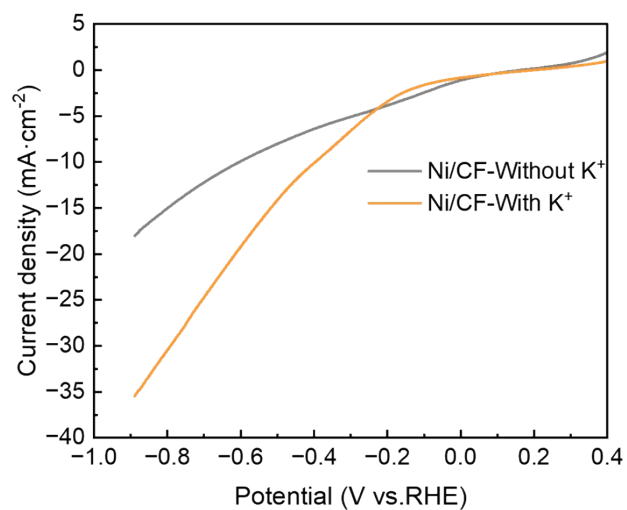

30

31 **Fig. S4** LSV curves of Ni/CF with and without  $\text{K}^+$  in electrolyte omitting the  $\text{NO}_3^-$ .

32

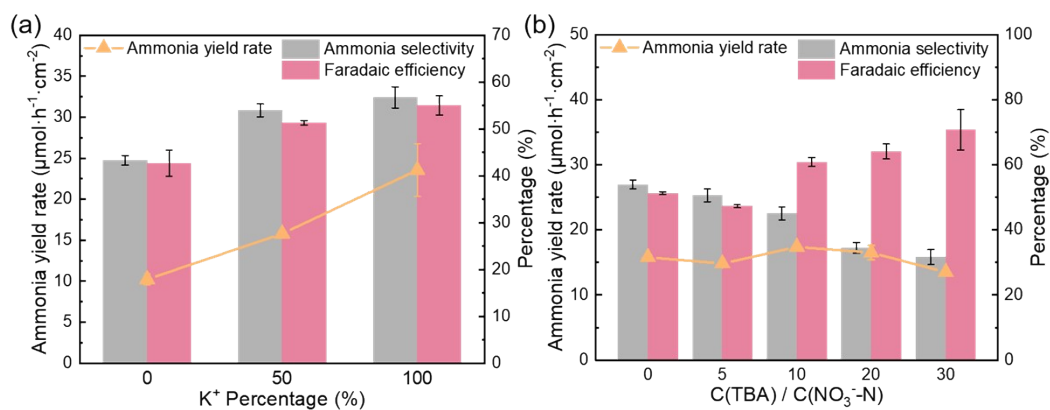

33

34 **Fig. S5** (a) The effects of K<sup>+</sup> on the NRA performance on the CF (-0.79 V vs. RHE,  
 35 0.1M NO<sub>3</sub><sup>-</sup>); (b) The performance changed with the ratios of TBA concentration to NO<sub>3</sub><sup>-</sup>  
 36 -N concentration (0, 5, 10, 20, and 30) on the CF.

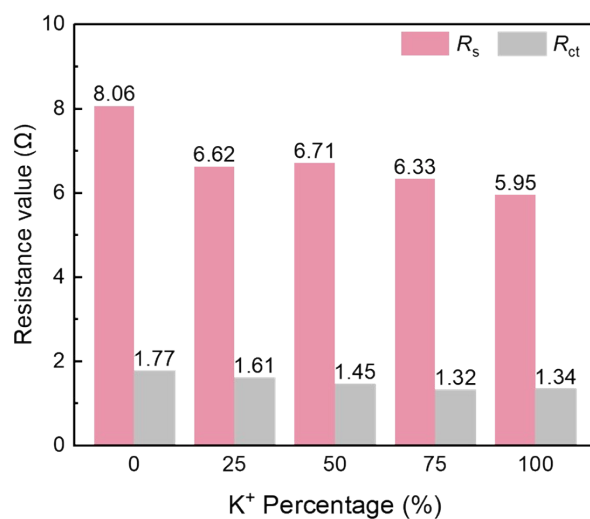

37

38 **Fig. S6** The solution resistance ( $R_s$ ) and charge transfer resistance ( $R_{ct}$ ) of the Ni/CF  
 39 catalyst by EIS.

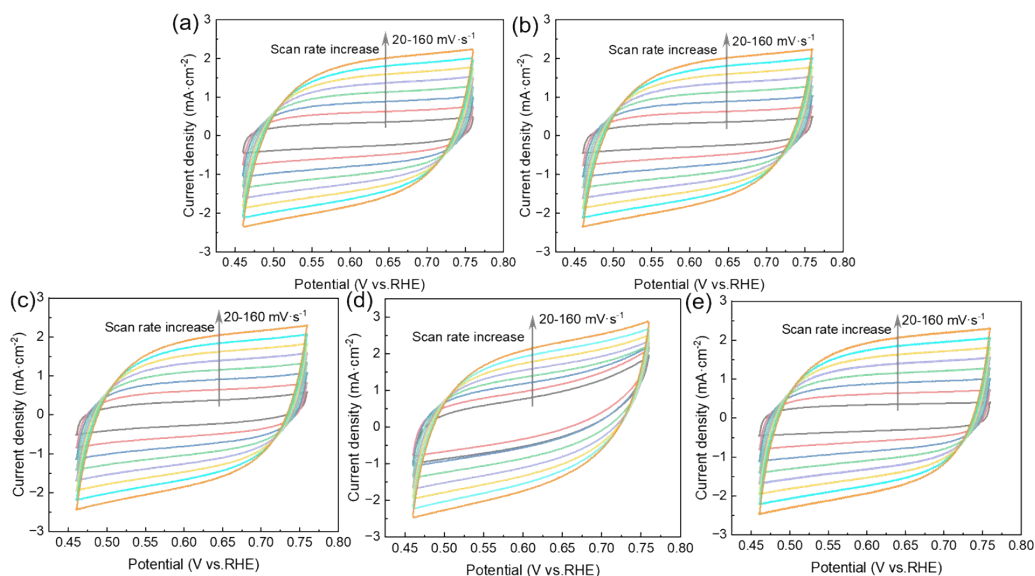

40

41 **Fig. S7** CV curves of the Ni/CF in the electrolyte containing (a) 0%, (b) 25%, (c) 50%

42 (d) 75%, and (e) 100%  $K^+$ .

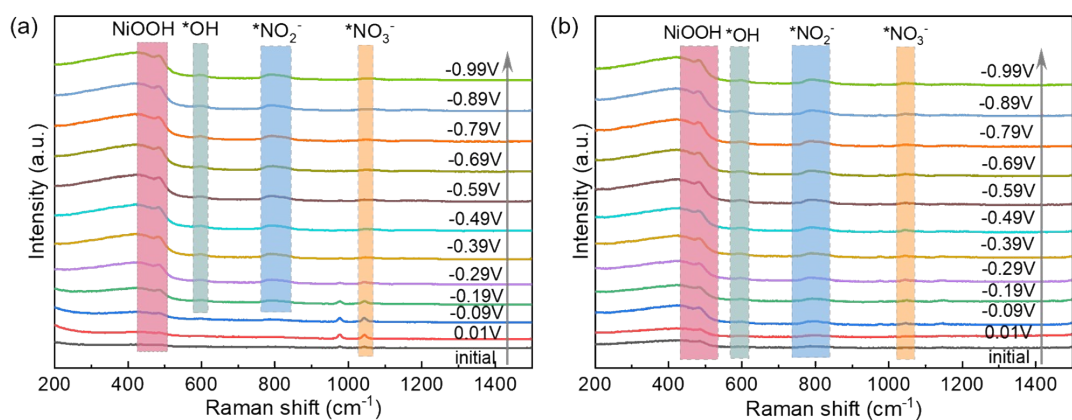

43

44 **Fig. S8** *In-situ* Raman spectroscopy of Ni/CF in (a) 50%  $K^+$ , (b) 100%  $K^+$  in electrolyte

45 at various potentials (0.01 ~ -0.99 V vs. RHE).

46

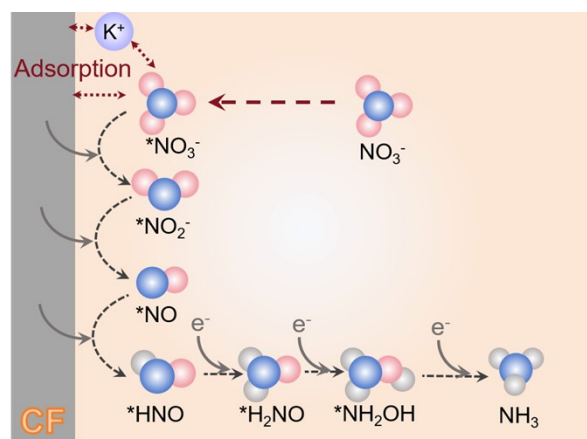

47 **Fig. S9** The proposed promoting mechanism of  $K^+$  for  $NH_3$  electro-synthesis on CF.
